# Supplementary material for: The role of terminal and bridge ligands in the molecular upconversion of lanthanide(iii) 1D coordination polymers
Source: Royal Society of Chemistry journal article supplement (doi:10.1039/d4tc03823a), 2024-11-15
Supplement: d4tc03823a1.pdf [file d4tc03823a1.pdf]

## Supplementary material

### The Role of Terminal and Bridge Ligands on the Molecular Upconversion of Lanthanide(III) 1D Coordination Polymers

Stefano A. de Andrade,<sup>a</sup> Airtton G. Bispo-Jr,<sup>a,b</sup> Deborah de A. Simoni,<sup>a</sup> Javier A. Ellena,<sup>c</sup> Italo O. Mazali,<sup>b</sup> and Fernando A. Sigoli<sup>a\*</sup>

<sup>a</sup> Institute of Chemistry, State University of Campinas, Campinas, São Paulo 13083-970, Brazil.

<sup>b</sup> Institute of Chemistry, University of São Paulo, São Paulo, São Paulo 05508-000, Brazil.

<sup>c</sup> Institute of Physics, University of São Paulo, São Carlos, São Paulo 13566-590, Brazil.

### Index

|                                                                                |    |
|--------------------------------------------------------------------------------|----|
| Supplementary Note S1 – Synthesis of the precursors and characterization ..... | 2  |
| Supplementary Note S2 – Crystallographic data .....                            | 5  |
| Supplementary Note S3 – Inter/intramolecular interactions .....                | 8  |
| Supplementary Note S4 – Powder X-ray diffraction analyses .....                | 18 |
| Supplementary Note S5 – FTIR .....                                             | 21 |
| Supplementary Note S6 – Additional photoluminescence data .....                | 22 |

## Supplementary Note S1 – Synthesis of the precursors and characterization

### Chemicals

Erbium oxide ( $\text{Er}_2\text{O}_3$ , 99.9%, Aldrich), ytterbium oxide ( $\text{Yb}_2\text{O}_3$ , 99.9%, Aldrich), 2,4-pentanedione (acetyl acetone or acac,  $\geq 99.9\%$ , Aldrich), 1,1,1-trifluoro-2,4-pentanedione (trifluoroacetylacetone or tfa, 98%, Aldrich), 1,1,1,5,5,5-hexafluoro-2,4-pentanedione (hexafluoroacetylacetone or hfa, 98%, Aldrich), 1,2-Bis(diphenylphosphino)-ethane (dppe, 98%, Aldrich), 1,4-Bis(diphenylphosphino)-butane (dppb, 98%, Aldrich), ethanol (EtOH, 99%, Synth), sodium hydroxide (97%, Química Moderna), hydrochloric acid (HCl, 36.5%, Merck), hydrogen peroxide ( $\text{H}_2\text{O}_2$ , 29%, Synth), and Toluene ( $\text{C}_6\text{H}_5\text{CH}_3$ , 99.5%, Synth) were used without any further purification.

### Synthesis of $[\text{Ln}(\text{acac})_3(\text{H}_2\text{O})_2]$ , $[\text{Ln}(\text{tfa})_3(\text{H}_2\text{O})_2]$ , and $[\text{Ln}(\text{hfa})_3(\text{H}_2\text{O})_2]$ precursor complexes.

The lanthanide precursor complexes  $[\text{Ln}(\text{acac})_3(\text{H}_2\text{O})_2]$ ,  $[\text{Ln}(\text{tfa})_3(\text{H}_2\text{O})_2]$  and  $[\text{Ln}(\text{hfa})_3(\text{H}_2\text{O})_2]$ , Ln = Er, Yb, acac = 2,4-pentanedione, tfa = 1,1,1-trifluoro-2,4-pentanedione, hfa = 1,1,1,5,5,5-hexafluoro-2,4-pentanedione, were synthesized following a well established pathway in literature (Figure S1)<sup>1</sup>. For that, 3.6 mmols of the ligand (acac, tfa or hfa) were weighted, put in a Becker with 5 mL of distilled water, and quickly 3.6 mmols of NaOH were added dropwise. In another Becker, 0.6 mmols of  $\text{YbCl}_3$  and 0.6 mmols of  $\text{ErCl}_3$  in aqueous solution were mixed and added dropwise to the ligand solution. The precursor complexes precipitated quickly, and the synthesis was left for a couple more hours, with the observation of a larger amount of precipitate the next morning, The precipitate was filtered and dried in vacuum. Yields:  $[\text{Ln}(\text{acac})_3(\text{H}_2\text{O})_2]$  = 65%-72%,  $[\text{Ln}(\text{tfa})_3(\text{H}_2\text{O})_2]$  = 48%-52%,  $[\text{Ln}(\text{hfa})_3(\text{H}_2\text{O})_2]$  = 22%-27%.

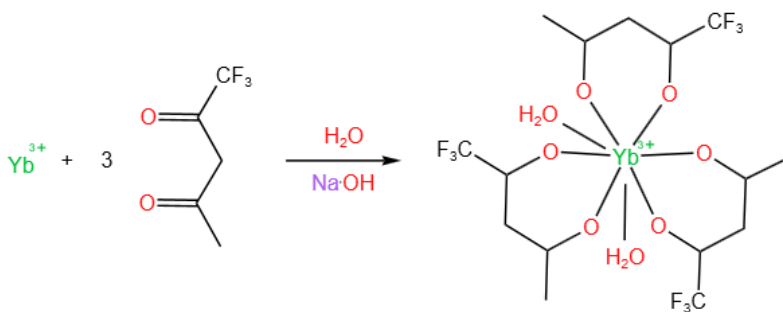

**Figure S1.** Synthetic pathway for the synthesis of the  $\text{Ln}^{\text{III}}$  complex precursors, using the  $[\text{Yb}(\text{tfa})_3(\text{H}_2\text{O})_2]$  case as example. The same process goes for acac and hfa ligands in place of tfa, and  $\text{Er}^{\text{III}}$  in place of  $\text{Yb}^{\text{III}}$ .

### Synthesis of Phosphine Oxides Bridging Ligands L

The phosphine oxides bridge ligands L = [(diphenylphosphoryl)R](diphenyl)phosphine oxide (R = ethyl or butyl), named dppeo or dppbo, respectively, were synthesized from bis(diphenylphosphino)R, called dppe and dppb (for R = ethyl or butyl, respectively). The pathway followed a well-spread literature protocol (Figure S2)<sup>2</sup>. For that, H<sub>2</sub>O<sub>2</sub> was added dropwise in a round bottom flask containing 30 mL toluene solution and dissolved dppe or dppb, under stirring over the course of 30 minutes at 0°C. The reaction was left over three hours with the intent of optimizing the yield, and more H<sub>2</sub>O<sub>2</sub> was added over the course of time. The precipitate was filtered 5 times with toluene and left to dry. Yield: > 90%.

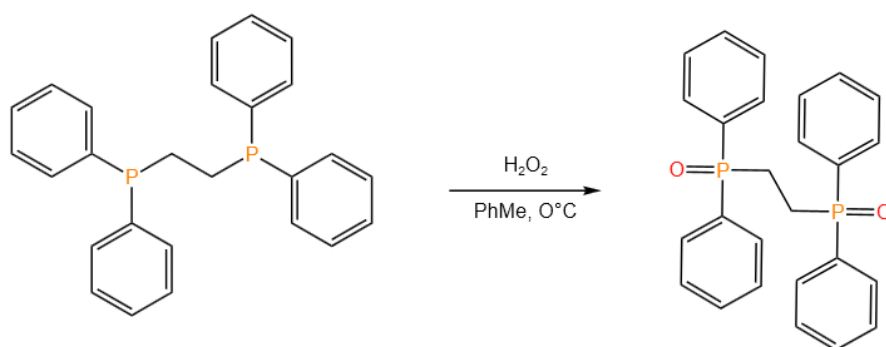

**Figure S2.** Synthetic pathway for the dppeo ligand. The same process was followed for dppbo.

### Characterization apparatus

The single-crystal X-Ray diffraction (SC-XRD) data collection of **1** and **4** were performed employing the Rigaku XtaLAB Synergy-S diffractometer, equipped with the HyPix-6000HE detector and MoK<sub>α</sub> radiation ( $\lambda = 0.71073 \text{ \AA}$  at 120 K) microfocus with a sealed X-ray source. The SC-XRD data of **2**, **3** and **5** were collected in a BRUKER APEX II Duo CCD DETECTOR DIFFRACTOMETER equipped with a fine-focus sealed tube, Mo K<sub>α</sub> ( $\lambda = 0.71073 \text{ \AA}$  at 120 K), as radiation source. The crystals were selected and mounted in cryoloop with mineral oil. The collection strategies and cell refinement for **1** and **4** were carried out using the CrysAlisPro. Moreover, the structures **1** and **4** were solved by direct methods employing SHELXL XT (version 2014/4) and refined using SHELX 64.<sup>3</sup> For **2**, **3**, and **5**, the collection strategies and cell refinement were carried out using the APEX2 (Bruker, 2010) and the structures were solved using the SHELXS97 (Sheldrick, 2008) software.<sup>4</sup> A multi-scan absorption correction was performed for all the compositions. The CIF file of **1** - **5** were deposited in the Cambridge Structural Database with CCDC numbers of 2381906, 2381909, 2381910, 2381911, and 2381913, respectively. Copies of the data can be accessed, free of charge, via [www.ccdc.ac.uk](http://www.ccdc.ac.uk).

Powder X-ray diffraction within 10–60° was measured using a Shimadzu XRD 7000 (Cu K $\alpha$ ,  $\lambda$  = 1.5418 Å) diffractometer operating at 40 kV and 30 mA, with scan rate of 0.5° min<sup>-1</sup>

FTIR spectra and data obtention of solid-state materials were carried out on a Agilent Cary 600 Series FTIR Spectrophotometer (660) in the range of 4,000 to 400 cm<sup>-1</sup> with a resolution of 1 cm<sup>-1</sup> with the help of an attenuated total reflectance (ATR) accessory.

Upconversion emission spectra were collected in a Fluorog-3 (Horiba FL3-22-iHR320) equipped with a double excitation (1200 groves nm<sup>-1</sup>, blazed 330 nm), and a double emission (1200 groves nm<sup>-1</sup>, blazed 500 nm) monochromator. The emission spectra were obtained using a 980 nm laser (Crystalaser DL980-1W-T0) with variable power densities as an excitation source. The emission spectra were corrected according to the photodetector spectral response.

## Supplementary Note S2 – Crystallographic data

**Table S1.** Crystal data and some refinement parameters for **1 - 5**.

|                                                                                                                  | <b>1</b>                                                                                                            | <b>2</b>                                                                                                               | <b>3</b>                                                                                                            | <b>4</b>                                                                                                              | <b>5</b>                                                                                                             |
|------------------------------------------------------------------------------------------------------------------|---------------------------------------------------------------------------------------------------------------------|------------------------------------------------------------------------------------------------------------------------|---------------------------------------------------------------------------------------------------------------------|-----------------------------------------------------------------------------------------------------------------------|----------------------------------------------------------------------------------------------------------------------|
| <b>Empirical formula</b>                                                                                         | C <sub>41</sub> H <sub>36</sub> ErF <sub>9</sub> O <sub>8</sub> P <sub>2</sub> Y<br>b                               | C <sub>41</sub> H <sub>27</sub> F <sub>18</sub> O <sub>8</sub> P <sub>2</sub> Tb                                       | C <sub>43</sub> H <sub>40</sub> F <sub>9</sub> O <sub>8</sub> P <sub>2</sub> Tb                                     | C <sub>43</sub> H <sub>31</sub> F <sub>18</sub> O <sub>8</sub> P <sub>2</sub> Yb                                      | C <sub>56</sub> H <sub>70</sub> O <sub>16</sub> P <sub>2</sub> Yb <sub>2</sub>                                       |
| <b>CCDC</b>                                                                                                      | 2381906                                                                                                             | 2381909                                                                                                                | 2381910                                                                                                             | 2381911                                                                                                               | 2381913                                                                                                              |
| <b>Formula Weight<br/>/ g mol<sup>-1</sup></b>                                                                   | 1056.90                                                                                                             | 1210.50                                                                                                                | 1076.62                                                                                                             | 1252.66                                                                                                               | 1407.14                                                                                                              |
| <b>Temperature<br/>/ K</b>                                                                                       | 120                                                                                                                 | 120                                                                                                                    | 120                                                                                                                 | 120                                                                                                                   | 120                                                                                                                  |
| <b>Wavelength<br/>/ Å</b>                                                                                        | 0.71073                                                                                                             | 0.71073                                                                                                                | 0.71073                                                                                                             | 0.71073                                                                                                               | 0.71073                                                                                                              |
| <b>Crystal system</b>                                                                                            | Triclinic                                                                                                           | Triclinic                                                                                                              | Triclinic                                                                                                           | Triclinic                                                                                                             | Triclinic                                                                                                            |
| <b>Space group</b>                                                                                               | <i>P</i> $\bar{1}$                                                                                                  | <i>P</i> $\bar{1}$                                                                                                     | <i>P</i> $\bar{1}$                                                                                                  | <i>P</i> $\bar{1}$                                                                                                    | <i>P</i> $\bar{1}$                                                                                                   |
| <b>Unit cell dimensions<br/>a, b, c / Å<br/><math>\alpha</math>, <math>\beta</math>, <math>\gamma</math> / °</b> | a=12.6940(8)<br>b=12.9971(8)<br>c=14.2063(8)<br>$\alpha$ =105.364(1)<br>$\beta$ =102.025(1)<br>$\gamma$ =103.618(1) | a=13.0460(13)<br>b=13.2860(14)<br>c=14.0894(15)<br>$\alpha$ =105.947(2)<br>$\beta$ =102.243(2)<br>$\gamma$ =102.910(2) | a=11.4899(11)<br>b=13.4321(12)<br>c=15.2194(14)<br>$\alpha$ =82.156(2)<br>$\beta$ =72.742(2)<br>$\gamma$ =88.205(2) | a=13.1953(10)<br>b=13.2045(10)<br>c=15.0669(10)<br>$\alpha$ =91.991(2)<br>$\beta$ =102.513(2)<br>$\gamma$ =108.947(2) | a=10.8843(10)<br>b=12.0573(10)<br>c=12.1748(10)<br>$\alpha$ =116.489(2)<br>$\beta$ =94.107(2)<br>$\gamma$ =91.258(2) |
| <b>Volume / Å<sup>3</sup></b>                                                                                    | 2102.9(2)                                                                                                           | 2189.2(4)                                                                                                              | 2222.0(4)                                                                                                           | 2408.2(3)                                                                                                             | 1423.8(2)                                                                                                            |
| <b>Z</b>                                                                                                         | 2                                                                                                                   | 2                                                                                                                      | 2                                                                                                                   | 2                                                                                                                     | 1                                                                                                                    |
| <b>Density (calculated)<br/>/ g cm<sup>-3</sup></b>                                                              | 1.669                                                                                                               | 1.836                                                                                                                  | 1.609                                                                                                               | 1.727                                                                                                                 | 1.641                                                                                                                |
| <b>F(000)</b>                                                                                                    | 1050.0                                                                                                              | 1188.0                                                                                                                 | 1076.0                                                                                                              | 1230.0                                                                                                                | 704.0                                                                                                                |
| <b>R (reflections)</b>                                                                                           | 0.0282 (7806)                                                                                                       | 0.0318 (8013)                                                                                                          | 0.0205 (10626)                                                                                                      | 0.0351 (7604)                                                                                                         | 0.0129 (7549)                                                                                                        |
| <b>wR<sup>2</sup> (reflections)</b>                                                                              | 0.0538 (9241)                                                                                                       | 0.0618 (9558)                                                                                                          | 0.0480 (11486)                                                                                                      | 0.0772 (9030)                                                                                                         | 0.0344 (7726)                                                                                                        |
| <b>Data completeness</b>                                                                                         | 0.994                                                                                                               | 0.997                                                                                                                  | 1.000                                                                                                               | 0.988                                                                                                                 | 1.000                                                                                                                |

**Table S2.** Shape analysis of the synthesized polymers and dimer utilizing SHAPE 2.1<sup>5</sup>. The value presented are the continuous shape measures (CShM, dimensionless) for each idealized geometry.

| Idealized Geometry                         | Short name | Point group | 1            | 2            | 3            | 4            | 5            |
|--------------------------------------------|------------|-------------|--------------|--------------|--------------|--------------|--------------|
| Square Antiprism                           | SAPR-8     | <i>D4d</i>  | <b>0.183</b> | <b>0.388</b> | 1.421        | <b>0.331</b> | <b>0.389</b> |
| Triangular dodecahedron                    | TDD-8      | <i>D2d</i>  | 2.224        | 1.774        | <b>0.482</b> | 1.736        | 1.792        |
| Biaugmented trigonal prism                 | BTPR-8     | <i>C2v</i>  | 1.855        | 1.500        | 1.577        | 1.617        | 1.823        |
| Biaugmented trigonal prism J50             | JBTPR-8    | <i>C2v</i>  | 2.328        | 1.876        | 1.945        | 1.977        | 2.359        |
| Snub diphenoid J84                         | JSD-8      | <i>D2d</i>  | 4.452        | 3.620        | 2.693        | 3.824        | 4.742        |
| Cube                                       | CU-8       | <i>Oh</i>   | 10.142       | 10.425       | 9.490        | 10.331       | 9.122        |
| Triakis tetrahedron                        | TT-8       | <i>Td</i>   | 10.982       | 11.237       | 10.192       | 10.946       | 9.986        |
| Hexagonal bipyramid                        | HBPY-8     | <i>D6h</i>  | 16.589       | 16.237       | 16.246       | 17.193       | 15.296       |
| Johnson gyrobifastigium J26                | JGBF-8     | <i>D2d</i>  | 15.254       | 14.234       | 13.717       | 15.416       | 14.735       |
| Heptagonal pyramid                         | HPY-8      | <i>C7v</i>  | 23.546       | 24.038       | 23.822       | 23.470       | 23.526       |
| Elongated trigonal bipyramid               | ETBPY-8    | <i>D3h</i>  | 24.057       | 24.329       | 24.859       | 24.328       | 23.925       |
| Johnson elongated triangular bipyramid J14 | JETBPY-8   | <i>D3h</i>  | 28.433       | 28.620       | 29.386       | 28.033       | 28.704       |

**Table S3.** Selected Ln-O bond distances in the coordination spheres. O1-O6 are  $\beta$ -diketone oxygen. O7-O8 are phosphine oxide oxygens for the coordination polymers.

| Bond                      | 1            | 2            | 3            | 4            | 5            |
|---------------------------|--------------|--------------|--------------|--------------|--------------|
|                           | Distance (Å) |
| Ln <sup>III</sup> – O1    | 2.3358(19)   | 2.248(2)     | 2.2875(13)   | 2.339(3)     | 2.3249(10)   |
| Ln <sup>III</sup> – O2    | 2.2731(19)   | 2.242(2)     | 2.2417(13)   | 2.240(3)     | 2.3794(10)   |
| Ln <sup>III</sup> – O3    | 2.3502(19)   | 2.364(2)     | 2.3632(13)   | 2.334(3)     | 2.3160(11)   |
| Ln <sup>III</sup> – O4    | 2.3315(19)   | 2.364(2)     | 2.3396(13)   | 2.361(3)     | 2.3134(11)   |
| Ln <sup>III</sup> – O5    | 2.3444(19)   | 2.351(2)     | 2.3574(13)   | 2.308(3)     | 2.2945(11)   |
| Ln <sup>III</sup> – O6    | 2.2622(18)   | 2.330(2)     | 2.2961(13)   | 2.218(3)     | 2.333(1)     |
| Ln <sup>III</sup> – O7    | 2.2731(19)   | 2.307(2)     | 2.3251(14)   | 2.388(3)     | 2.3629(10)   |
| Ln <sup>III</sup> – O8    | 2.3309(19)   | 2.373(2)     | 2.3166(14)   | 2.355(3)     | 2.2778(11)   |
| $\beta$ -diketone average | 2.3162       | 2.3165       | 2.3142       | 2.300        | 2.32564      |

**Table S4.** Bond angles for the coordination spheres in all the synthesized compounds.

|                 | 1          | 2         | 3         | 4          | 5         |
|-----------------|------------|-----------|-----------|------------|-----------|
| <b>Bond</b>     | Angle (°)  | Angle (°) | Angle (°) | Angle (°)  | Angle (°) |
| <b>O3-Ln-O4</b> | 72.38(7)   | 73.41(7)  | 73.50(5)  | 72.49(9)   | 72.93(4)  |
| <b>O5-Ln-O6</b> | 74.96(7)   | 71.91(7)  | 74.51(5)  | 71.21(11)  | 73.44(4)  |
| <b>O7-Ln-O8</b> | 72.29(7)   | 72.21(7)  | 72.26(5)  | 74.3(1)    | 73.56(4)  |
| <b>P1-O1-Ln</b> | 154.32(13) | 161.07(8) | 161.07(8) | 153.16(17) | 156.21(7) |
| <b>P2-O2-Ln</b> | 158.64(12) | 177.14(9) | 177.14(9) | 158.38(17) | -----     |

**Table S5.** Chain linearity angle and shortest distances between lanthanide cores for the synthesized compounds.

|                                              | 1          | 2          | 3          | 4          | 5         |
|----------------------------------------------|------------|------------|------------|------------|-----------|
| <b>Ln-Ln-Ln Angle / °</b>                    | 173.225(4) | 174.984(5) | 75.921(3)  | 178.187(4) | -----     |
| <b>Ln-Ln intramolecular Distance / Å</b>     | 8.2958(4)  | 8.4443(7)  | 10.7704(8) | 9.2853(6)  | 8.8327(7) |
| <b>Ln --- Ln intermolecular distance / Å</b> | 11.6276(6) | 12.4334(9) | 8.1045(7)  | 11.7562(7) | 5.8324(5) |

### Supplementary Note S3 – Inter/intramolecular interactions

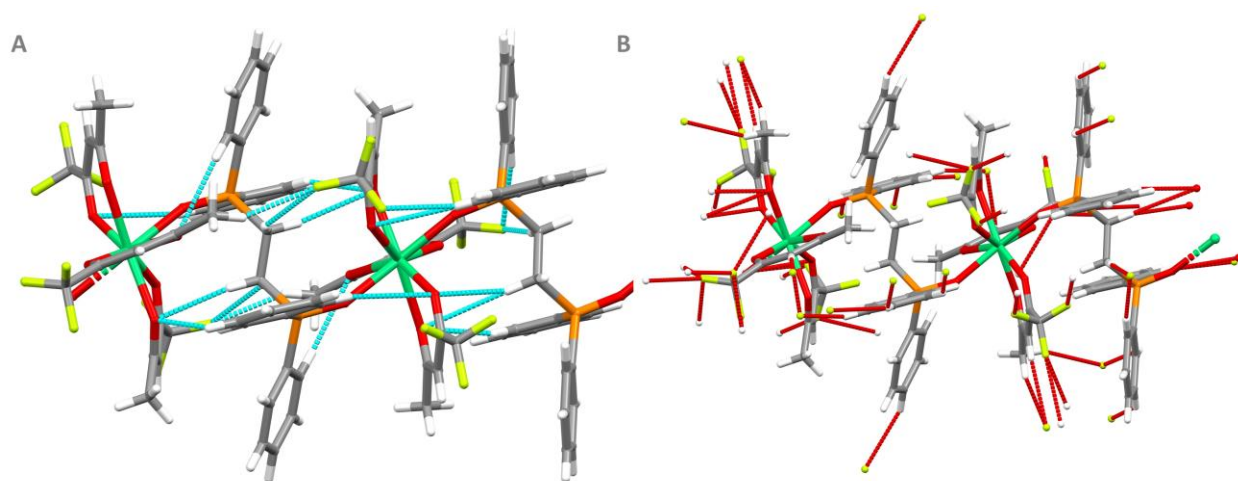

**Figure S3.** (a) Intra and (b) intermolecular hydrogen bonds of **1**.

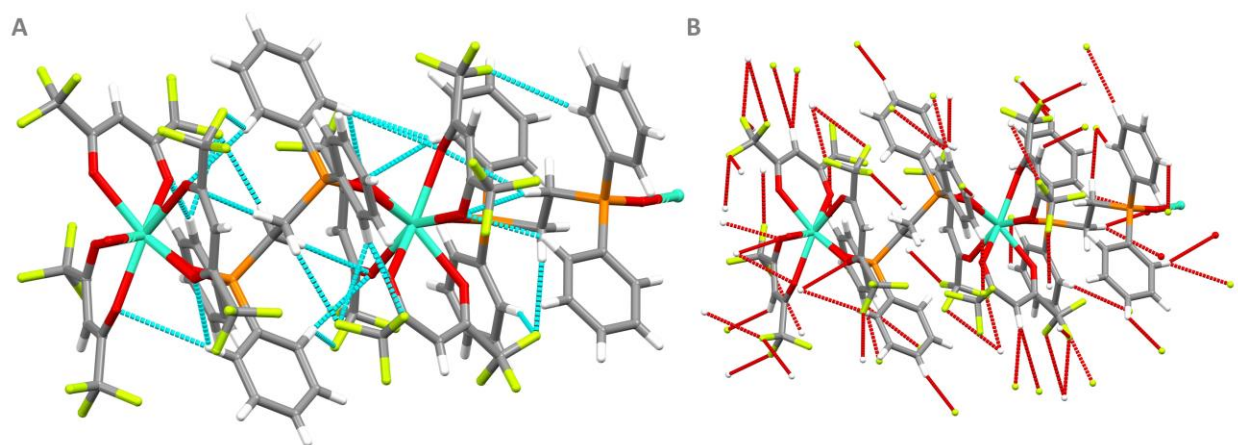

**Figure S4.** (a) Intra and (b) intermolecular hydrogen bonds of **2**.

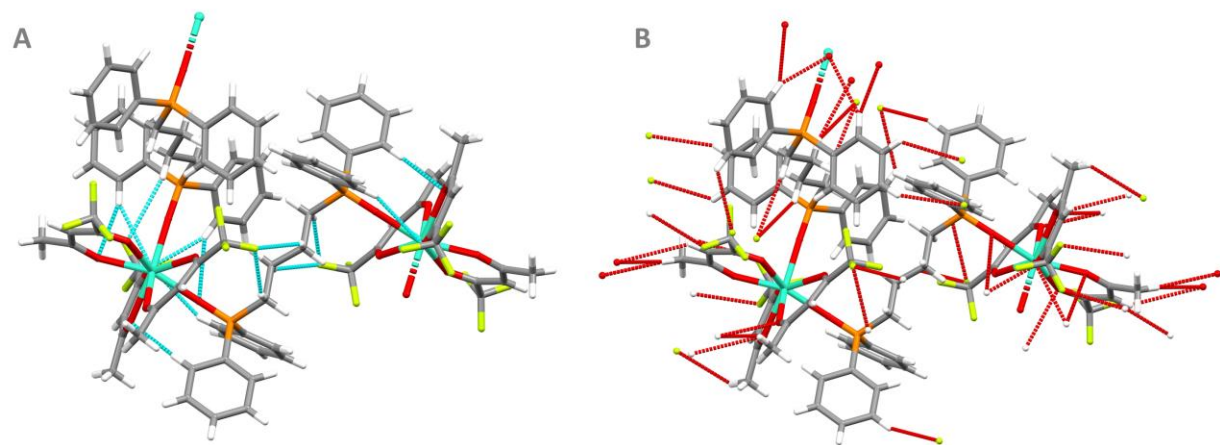

**Figure S5.** (a) Intra and (b) intermolecular hydrogen bonds of **3**.



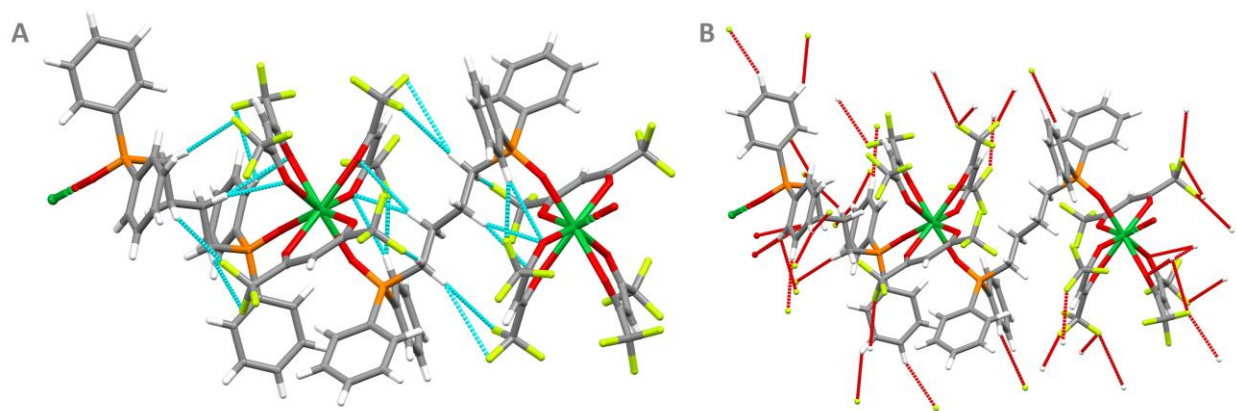

**Figure S6.** (a) Intra and (b) intermolecular hydrogen bonds of 4.

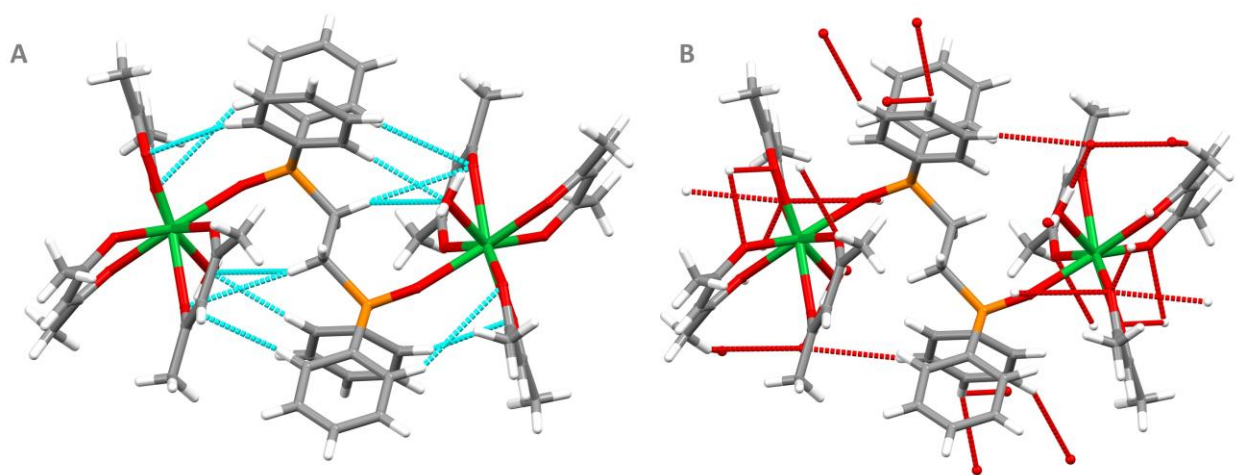

**Figure S7.** (a) Intra and (b) intermolecular hydrogen bonds of 5.

**Table S6.** Intra/intermolecular H-bond distances for **1**.

| <b>Intramolecular H-bonds</b> |               |                     |
|-------------------------------|---------------|---------------------|
| <b>Atom 1</b>                 | <b>Atom 2</b> | <b>Distance / Å</b> |
| F1B                           | H226          | 2.566               |
| F1B                           | H23A          | 2.619               |
| F1C                           | H215          | 2.727               |
| F2C                           | H13A          | 3.243               |
| F2C                           | H5BC          | 2.49                |
| O1A                           | H111          | 3.093               |
| O1A                           | H23B          | 2.714               |
| O1C                           | H215          | 2.946               |
| O2A                           | H211          | 2.519               |
| O2A                           | H23B          | 3.044               |
| O2B                           | H125          | 2.685               |
| O2C                           | H115          | 2.479               |
| O2C                           | H13B          | 2.638               |
| <b>Intermolecular H-Bonds</b> |               |                     |
| H211                          | O2A           | 2.519               |
| H23B                          | O1A           | 2.714               |
| H23B                          | O2A           | 3.044               |
| H215                          | F1C           | 2.727               |
| H215                          | O1C           | 2.946               |
| H226                          | F1B           | 2.566               |
| H23A                          | F1B           | 2.619               |
| F1A                           | H113          | 2.835               |
| F2A                           | H112          | 2.951               |
| H113                          | F1B           | 3.255               |
| H114                          | F3B           | 2.792               |
| F2B                           | H3B           | 2.876               |
| F3B                           | H3B           | 2.738               |
| F3A                           | H3A           | 2.881               |
| F3A                           | H5AA          | 2.608               |
| F1C                           | H223          | 3.004               |
| F3C                           | H5AB          | 3.071               |
| F3C                           | H222          | 2.674               |
| H123                          | F3B           | 2.87                |

**Table S7.** Intra/intermolecular H-bond distances for **2**.

| <b>Intramolecular H-bonds</b> |               |                     |
|-------------------------------|---------------|---------------------|
| <b>Atom 1</b>                 | <b>Atom 2</b> | <b>Distance / Å</b> |
| F1                            | H19           | 2.718               |
| F1                            | H26A          | 2.617               |
| F2                            | H19           | 2.533               |
| F4                            | H2            | 2.631               |
| F4                            | H13A          | 2.494               |
| F9                            | H2            | 2.801               |
| F15                           | H25           | 2.455               |
| F18                           | H12           | 2.872               |
| O3                            | H19           | 2.726               |
| O5                            | H21           | 3.005               |
| O5                            | H13B          | 2.819               |
| O6                            | H8            | 2.554               |
| O6                            | H13B          | 3.005               |
| O7                            | H25           | 2.64                |
| O7                            | H26B          | 2.693               |
| O8                            | H12           | 2.951               |
| O8                            | H21           | 2.679               |
| <b>Intermolecular H-bonds</b> |               |                     |
| O3                            | H19           | 2.726               |
| O5                            | H21           | 3.005               |
| O5                            | H13B          | 2.819               |
| O6                            | H8            | 2.554               |
| O6                            | H13B          | 3.005               |
| O7                            | H25           | 2.64                |
| O7                            | H26B          | 2.693               |
| O8                            | H12           | 2.951               |
| O8                            | H21           | 2.679               |
| H8                            | O6            | 2.554               |
| H13B                          | O5            | 2.819               |
| H13B                          | O6            | 3.005               |
| H12                           | O8            | 2.951               |

**Table S8.** Intra/intermolecular H-bond distances for **3**.

| <b>Intramolecular H-bonds</b> |               |                     |
|-------------------------------|---------------|---------------------|
| <b>Atom 1</b>                 | <b>Atom 2</b> | <b>Distance / Å</b> |
| H1A                           | F4            | 2.665               |
| H2A                           | F4            | 2.801               |
| H8                            | O4            | 2.522               |
| H14                           | O3            | 2.846               |
| H16B                          | O7            | 2.901               |
| H18                           | O1            | 3.188               |
| H18                           | O3            | 2.438               |
| H24                           | O3            | 2.854               |
| <b>Intermolecular H-bonds</b> |               |                     |
| H5                            | F5            | 2.985               |
| F5                            | H21           | 2.881               |
| H25                           | F3            | 2.894               |
| H26                           | F1            | 2.919               |
| H33A                          | F9            | 2.874               |
| H41                           | O4            | 3.213               |
| H43C                          | O4            | 2.741               |
| H43C                          | O6            | 2.749               |
| O1                            | H18           | 3.188               |
| H16B                          | O7            | 2.901               |
| H18                           | O3            | 2.438               |
| H24                           | O3            | 2.854               |
| H24                           | O8            | 2.768               |
| H16B                          | F7B           | 3.198               |
| H15B                          | F7B           | 2.869               |

**Table S9.** Intra/intermolecular H-bond distances for **4**.

| <b>Intramolecular H-bonds</b> |               |                     |
|-------------------------------|---------------|---------------------|
| <b>Atom 1</b>                 | <b>Atom 2</b> | <b>Distance / Å</b> |
| F2C                           | H13A          | 2.656               |
| F3B                           | H23A          | 3.077               |
| F4A                           | H13B          | 3.169               |
| F4B                           | H225          | 2.999               |
| F5C                           | H23B          | 2.891               |
| F6A                           | H13B          | 3.255               |
| F6C                           | H23B          | 3.043               |
| F6C                           | H23D          | 2.907               |
| H121                          | F1A           | 2.64                |
| O1A                           | H121          | 2.784               |
| O1A                           | H13D          | 2.742               |
| O1B                           | H23C          | 2.981               |
| O2A                           | H13D          | 2.922               |
| O2B                           | H225          | 2.766               |
| O2B                           | H23C          | 2.861               |
| <b>Intermolecular H-bonds</b> |               |                     |
| H214                          | F5C           | 2.662               |
| H125                          | F5A           | 3.013               |
| H213                          | F4B           | 2.725               |
| H23A                          | F3B           | 3.077               |
| H23D                          | F6C           | 2.907               |
| H225                          | F4B           | 2.999               |
| H23B                          | F5C           | 2.891               |
| H23B                          | F6C           | 3.043               |
| H223                          | F6A           | 2.865               |
| H224                          | F3A           | 2.595               |
| H223                          | F5A           | 3.236               |
| H225                          | O2B           | 2.766               |
| H23C                          | O1B           | 2.981               |
| H23C                          | O2B           | 2.861               |

**Table S10.** Intra/intermolecular H-bond distances for **5**.

| Intramolecular H-bonds |        |              |
|------------------------|--------|--------------|
| Atom 1                 | Atom 2 | Distance / Å |
| O3                     | H12    | 2.516        |
| O3                     | H29B   | 3.024        |
| O5                     | H6     | 3.025        |
| O5                     | H29B   | 3.165        |
| O8                     | H2     | 3.283        |
| O9                     | H8     | 2.735        |
| O3                     | H12    | 2.516        |
| O3                     | H29B   | 3.024        |
| Intermolecular H-bonds |        |              |
| H11                    | O8     | 2.906        |
| O1                     | H22B   | 3.009        |
| H3A                    | O7     | 2.004        |
| H3B                    | O8     | 2.096        |
| O8                     | H22B   | 3.151        |
| O4                     | H9     | 3.06         |
| O6                     | H10    | 2.676        |
| O9                     | H10    | 2.735        |

**Table S11.** F ··· F interaction distances for **1 – 5**.

| Intramolecular F ··· F interactions for 2 |        |              |
|-------------------------------------------|--------|--------------|
| Atom 1                                    | Atom 2 | Distance / Å |
| F1A                                       | F1B    | 2.752        |
| Intermolecular F ··· F interactions for 2 |        |              |
| F2                                        | F10    | 2.89         |
| F14                                       | F15    | 2.907        |
| F15                                       | F15    | 2.842        |
| Intramolecular F ··· F interactions for 2 |        |              |
| F4                                        | F9     | 2.792        |
| Intermolecular F ··· F interactions for 4 |        |              |
| F5B                                       | F2B    | 2.882        |
| F1B                                       | F1B    | 2.923        |

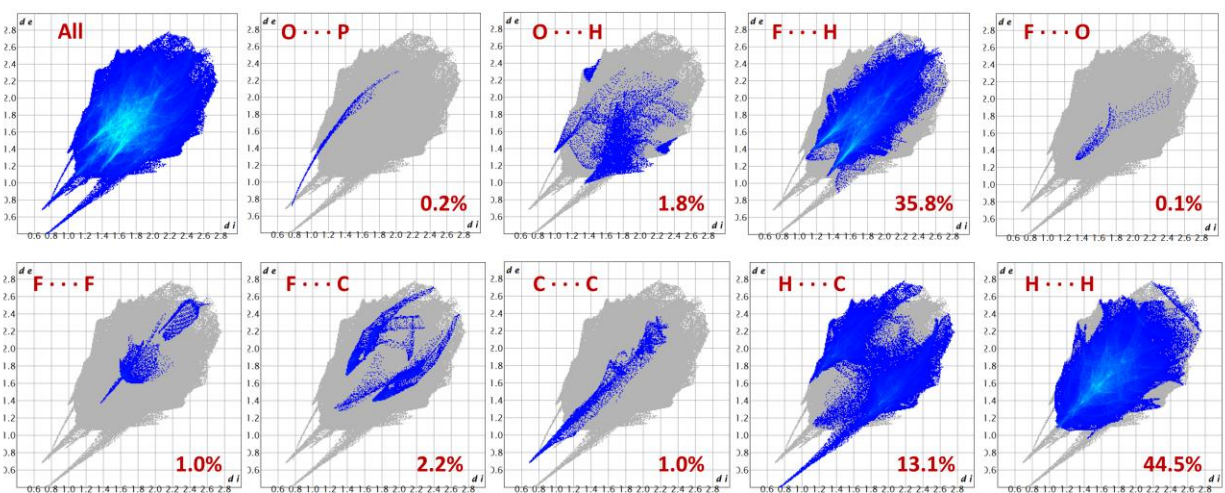

**Figure S8.** The 2D fingerprint plots of interatomic interactions of **1**, showing the percentages of contacts contributed to the total Hirshfeld surface area of the molecules.

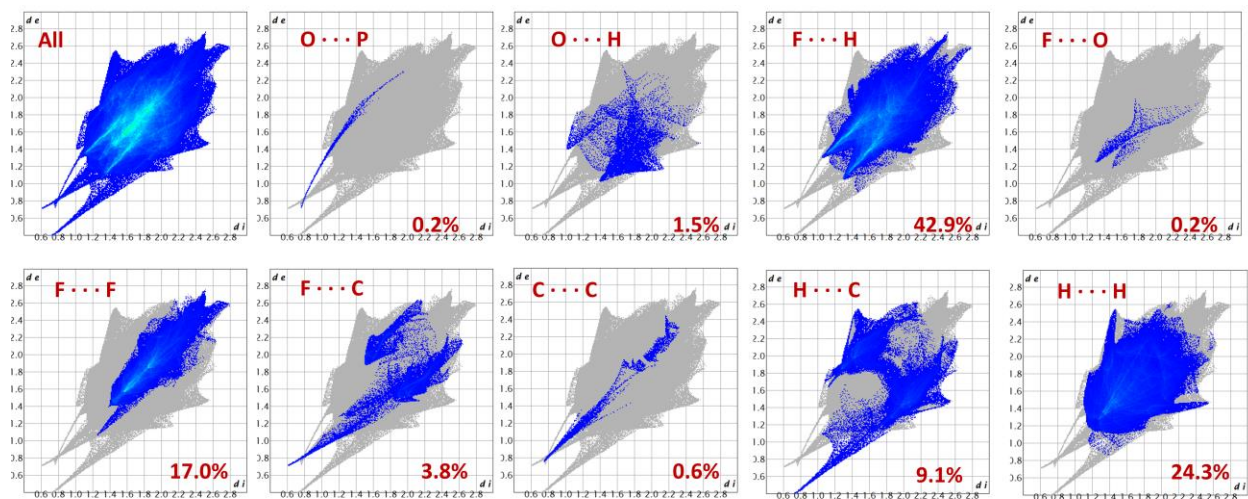

**Figure S9.** The 2D fingerprint plots of interatomic interactions of **2**, showing the percentages of contacts contributed to the total Hirshfeld surface area of the molecules.

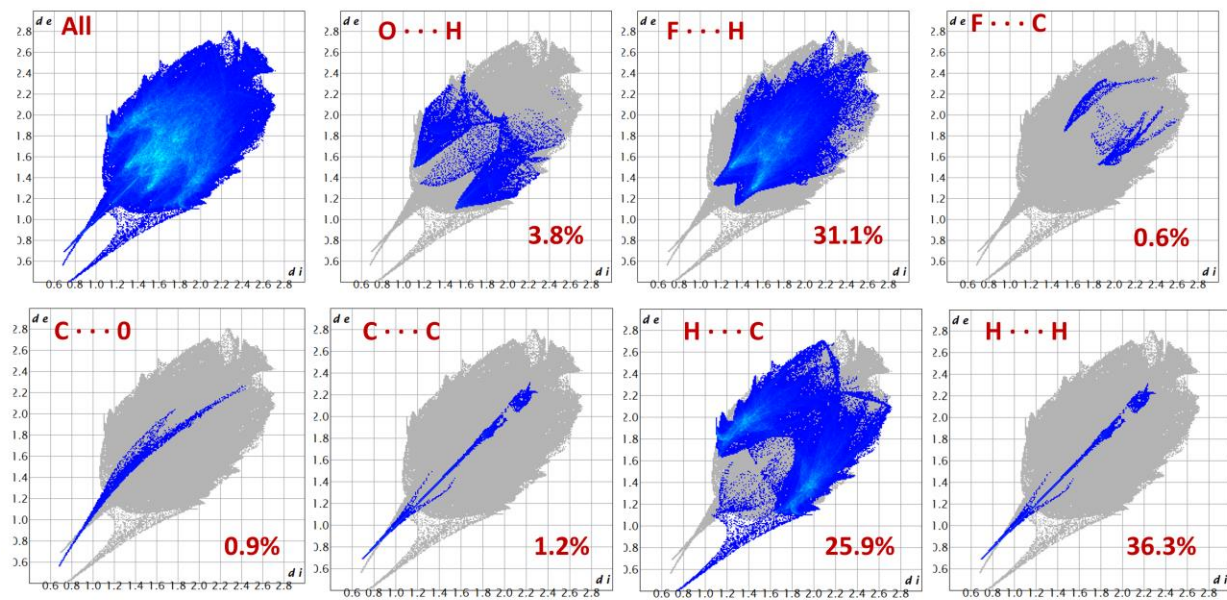

**Figure S10.** The 2D fingerprint plots of interatomic interactions of **3**, showing the percentages of contacts contributed to the total Hirshfeld surface area of the molecules.

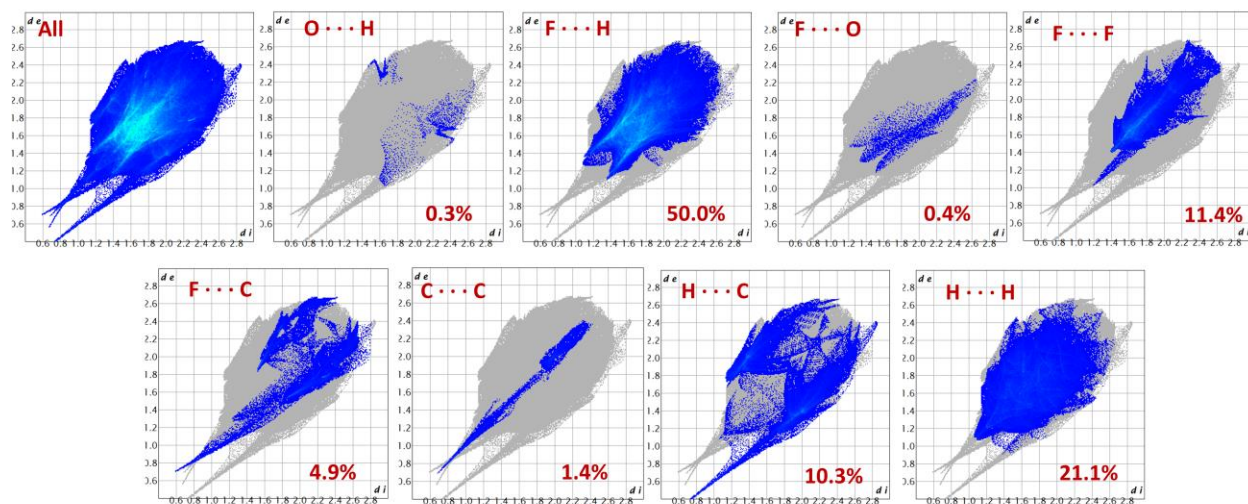

**Figure S11.** The 2D fingerprint plots of interatomic interactions of **4**, showing the percentages of contacts contributed to the total Hirshfeld surface area of the molecules.



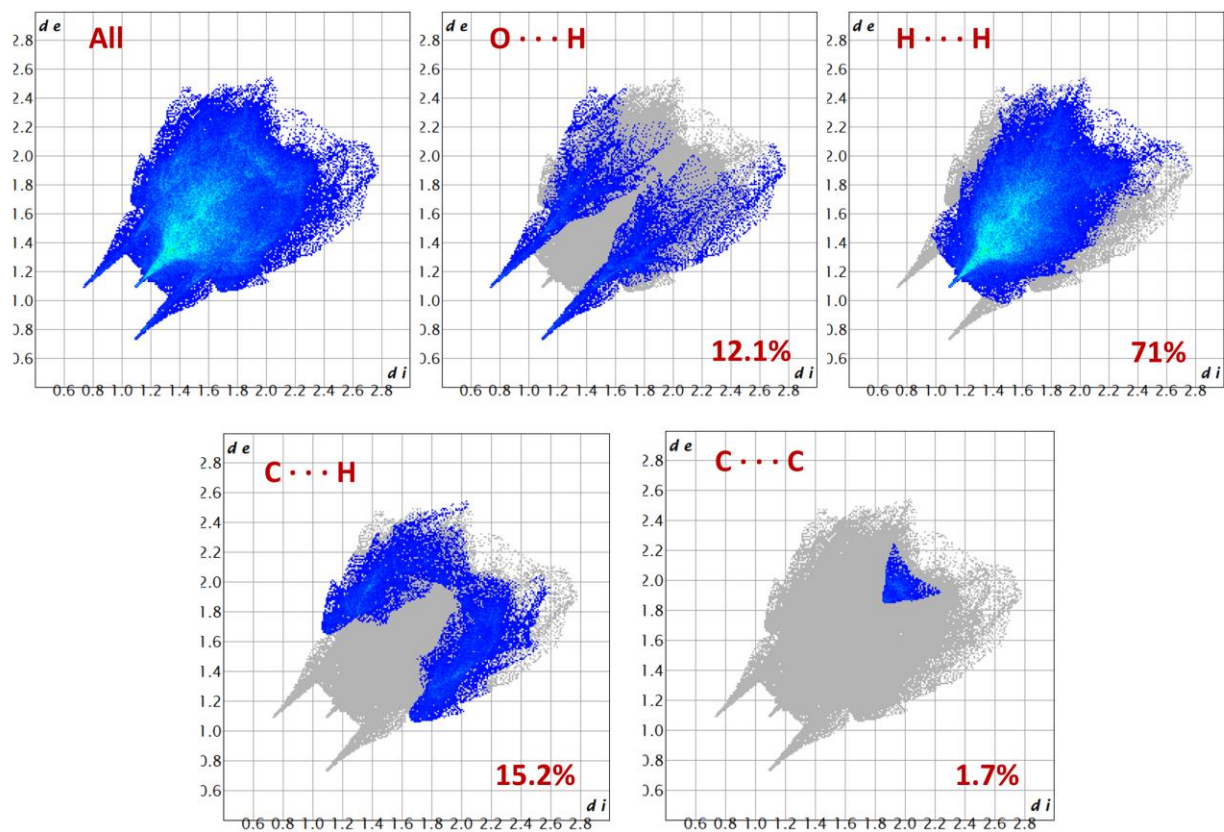

**Figure S12.** The 2D fingerprint plots of interatomic interactions of **5**, showing the percentages of contacts contributed to the total Hirshfeld surface area of the molecules.

Supplementary Note S4 – Powder X-ray diffraction analyses

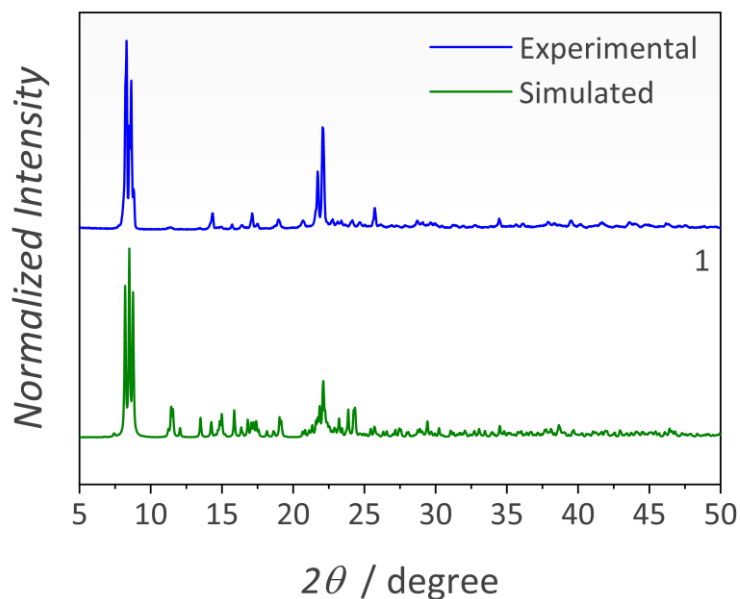

**Figure S13.** Powder XRD (PXRD) of crashed crystals of **1** compared to the simulated PXRD pattern determined from the SC-XRD of the compound.

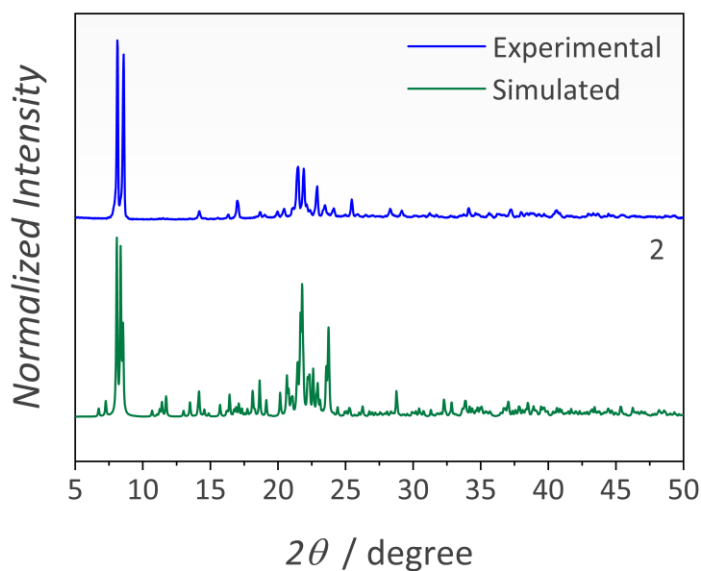

**Figure S14.** Powder XRD (PXRD) of crashed crystals of **2** compared to the simulated PXRD pattern determined from the SC-XRD of the compound.

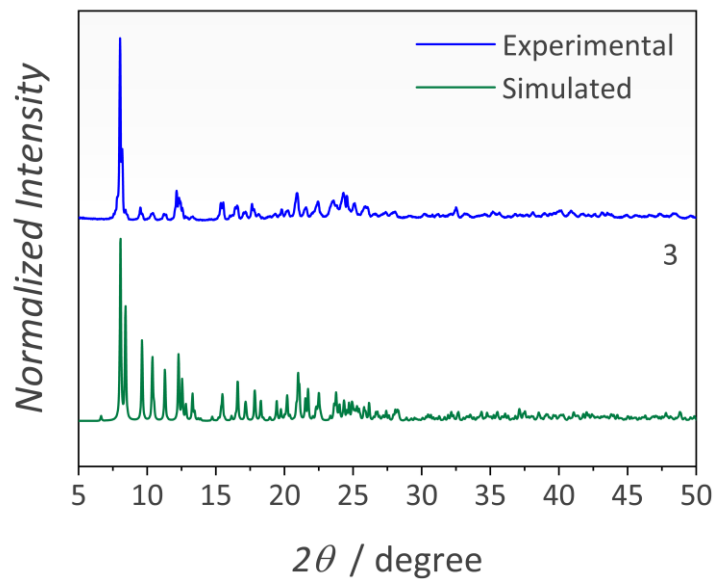

**Figure S15.** Powder XRD (PXRD) of crashed crystals of **3** compared to the simulated PXRD patten determined from the SC-XRD of the compound.

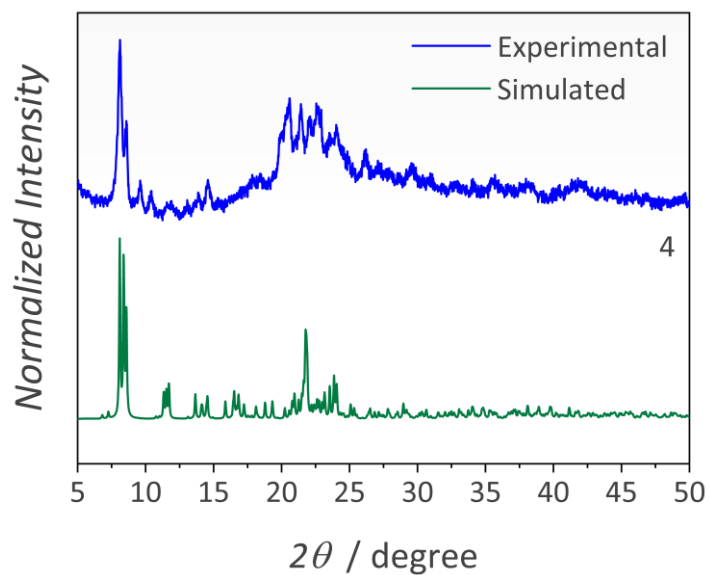

**Figure S16.** Powder XRD (PXRD) of crashed crystals of **4** compared to the simulated PXRD patten determined from the SC-XRD of the compound.

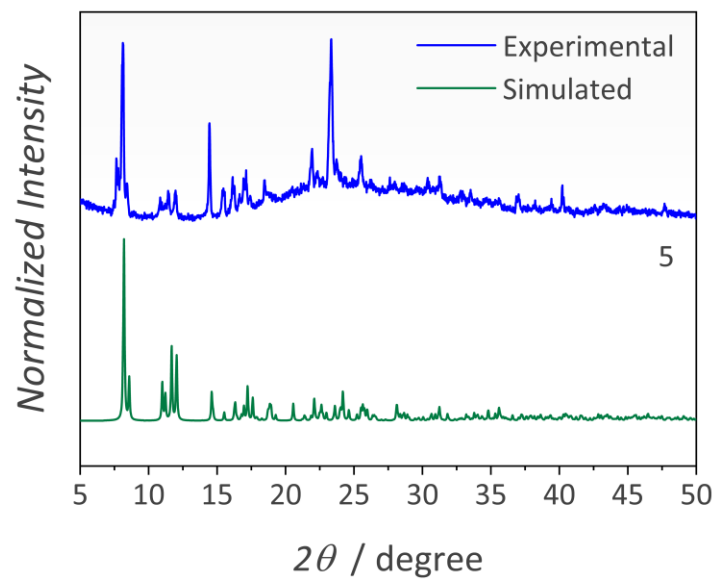

**Figure S17.** Powder XRD (PXRD) of crashed crystals of **5** compared to the simulated PXRD pattern determined from the SC-XRD of the compound.

### Supplementary Note S5 – FTIR

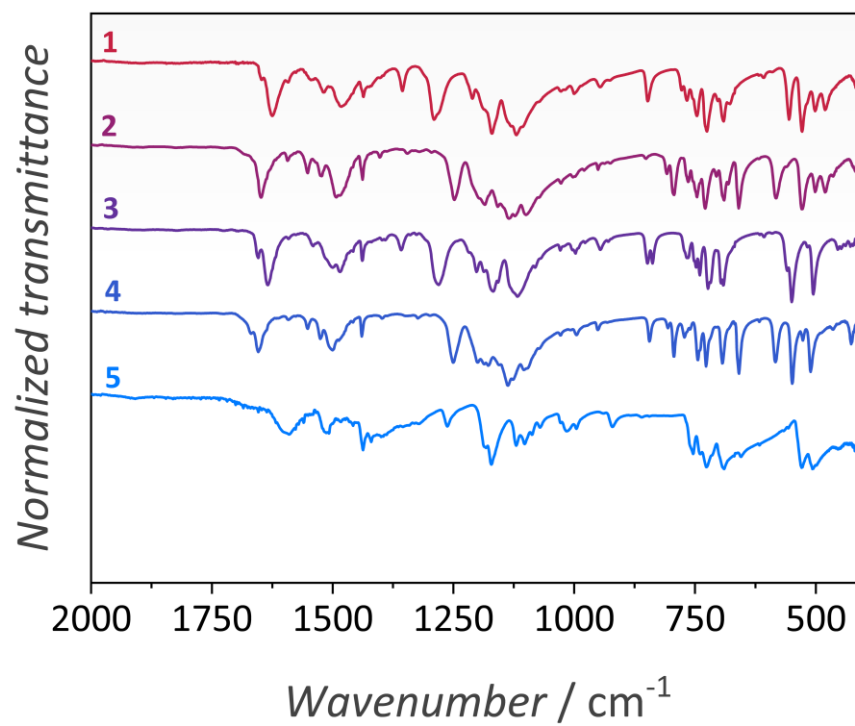

**Figure S18.** FTIR spectra of **1 - 5**.

**Table S12.** Position of the C=O and P=O vibrational modes in the FTIR spectra of **1 – 5**.

|            | <b>1</b>              | <b>2</b>              | <b>3</b>              | <b>4</b>              | <b>5</b>              |
|------------|-----------------------|-----------------------|-----------------------|-----------------------|-----------------------|
| <b>C=O</b> | 1625 cm <sup>-1</sup> | 1632 cm <sup>-1</sup> | 1648 cm <sup>-1</sup> | 1653 cm <sup>-1</sup> | 1593 cm <sup>-1</sup> |
| <b>P=O</b> | 1121 cm <sup>-1</sup> | 1117 cm <sup>-1</sup> | 1099 cm <sup>-1</sup> | 1102 cm <sup>-1</sup> | 1120 cm <sup>-1</sup> |

Supplementary Note S6 – Additional photoluminescence data

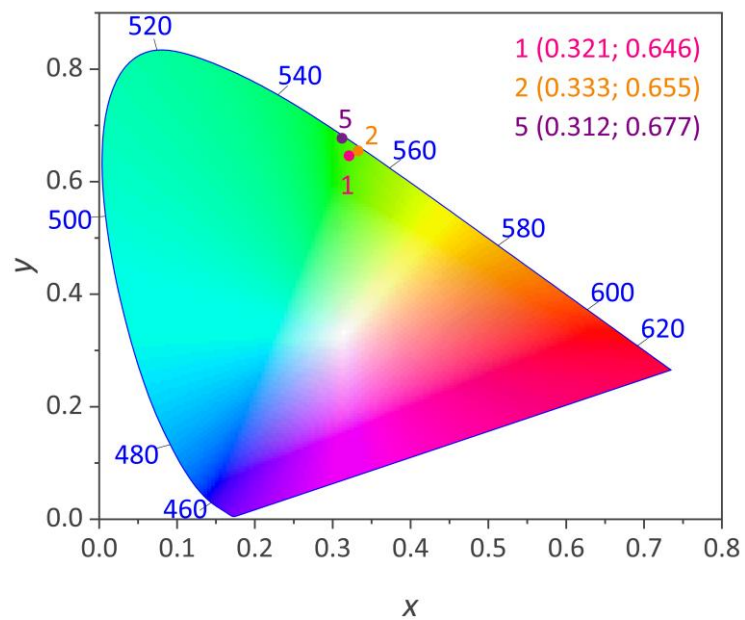

**Figure S19.** 1931 *Commission Internationale de L'éclairage* (CIE) colour coordinate diagram calculated from the emission spectrum of **1**, **2**, and **5**.

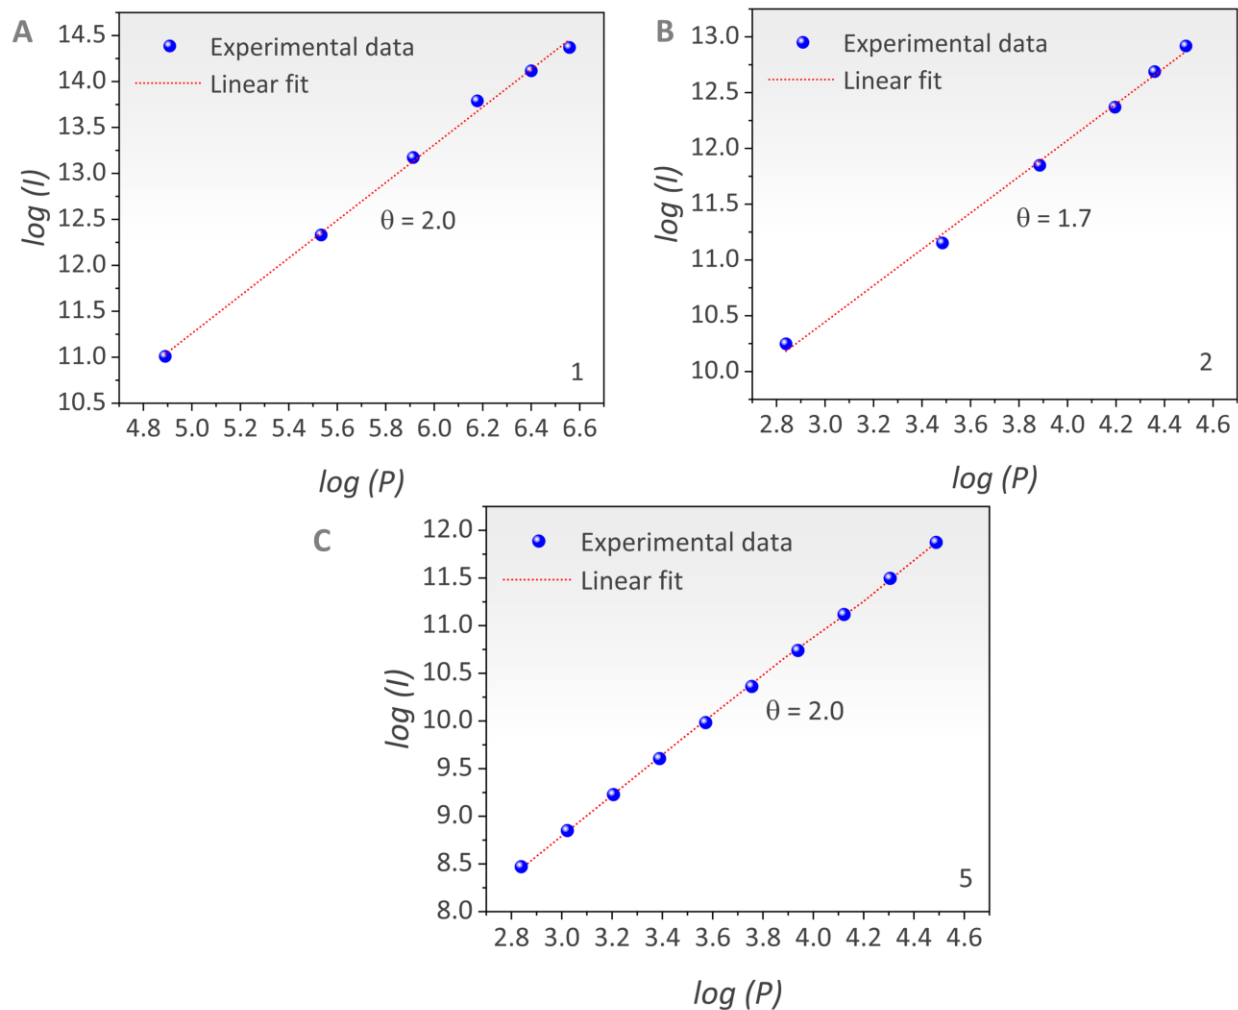

**Figure S20.** Intensity ( $I$ ) dependency on the excitation power density ( $P$ ) (in log scale) for **1**, **2** and **5**. The linear adjustment is also represented in the image ( $R^2 > 0.99$ ).

## References

- <sup>1</sup> A. G. Bispo-Jr, L. Yeh, D. Errulat, D. A. Galico, F. A. Sigoli and M. Murugesu, *Chem. Commun.*, 2023, **59**, 8723-8726
- <sup>2</sup> K. A. Lotsman, K. S. Rodygin, I. Skivortsova, A. M. Kuts kaya, M. E. Minyaev and V. P. Ananikov, *Org. Chem. Front.*, 2023, **10**, 1022-1033
- <sup>3</sup> G. M. Sheldrick, *Acta Cryst.*, 2015, **C71**, 3-8.
- <sup>4</sup> G. M. Sheldrick, *Acta Cryst.*, 2008, **A64**, 112-122
- <sup>5</sup> M. Pinsky, D. Avnir, *Inorg. Chem.*, 1998, **37**, 5575.
